# Supplementary material
Source: MDPI journal article supplement (https://www.mdpi.com/2073-4433/14/8/1197)
Supplement: s1 [file s1]

Supplementary Material:  
Adaptive Parameter Estimation of the Generalized Extreme Value  
Distribution by Using Artificial Neural Network Approach

Tossapol Phoophiwfa<sup>1</sup> Teerawong Laosuwan<sup>2</sup> Andrei Volodin<sup>3</sup>  
Nipada Papukdee<sup>4</sup> Sujitta Suraphee<sup>1</sup> Piyapatr Busababodhin<sup>1</sup>

<sup>1</sup>Digital Innovation Research Cluster for Integrated Disaster Management in the Watershed,  
Mahasarakham University, Thailand.

<sup>2</sup>Department of Physics, Faculty of Science, Mahasarakham University, Thailand.

<sup>3</sup>Department of Mathematics and Statistics, University of Regina, Canada.

<sup>3</sup>Department of Applied Statistics, Rajamangala University of Technology  
Isan Khon Kaen Campus, Thailand.

July 25, 2023

# 1 Correlation Analysis

Table S 1: Attribute types, notation, and predictor variables.

| Attribute type           | Attribute                              | Notation                    |
|--------------------------|----------------------------------------|-----------------------------|
| GEVD attributes          | Location parameter estimate            | $\mu$ or mu ( $x_1$ )       |
|                          | Scale parameter estimate               | $\sigma$ or sigma ( $x_2$ ) |
|                          | Shape parameter estimate               | $\xi$ or xi ( $x_3$ )       |
| Geographical coordinates | Latitude                               | LAT ( $x_4$ )               |
|                          | Longitude                              | LON ( $x_5$ )               |
| Meteorological Variables | Maximum Rainfall                       | max_rain ( $x_6$ )          |
|                          | Average Rainfall                       | average_rain ( $x_7$ )      |
|                          | Cumulative Rainfall                    | sum_rain ( $x_8$ )          |
|                          | Average Minimum Rainfall               | min_average_rain ( $x_9$ )  |
|                          | Maximum Windspeed                      | max_wind ( $x_{10}$ )       |
|                          | Average Windspeed                      | average_wind ( $x_{11}$ )   |
|                          | Maximum Temperature                    | max_temp ( $x_{12}$ )       |
|                          | Minimum Temperature                    | min_temp ( $x_{13}$ )       |
|                          | Average Temperature                    | average_temp ( $x_{14}$ )   |
|                          | Average Relative humidity              | average_RH ( $x_{15}$ )     |
|                          | Maximum Relative humidity              | max_RH ( $x_{16}$ )         |
| Satellite Images         | Normalized Difference Vegetation Index | NDVI ( $x_{17}$ )           |
| Hydrological variables   | Maximum Runoff                         | max_runoff ( $x_{18}$ )     |
|                          | Average Runoff                         | average_runoff ( $x_{19}$ ) |

**Note:** The parameters  $\mu$ ,  $\sigma$  and  $\xi$  in this table are deterministic and represent the location, scale, and shape parameters of the GEVD, respectively.

Table S 2: Pearson correlation coefficient between 19 variables in attribute types with the GEVD attributes, Geographical coordinates, Satellite Images and Hydrological variables.

|          | $x_1$        | $x_2$       | $x_3$        | $x_4$        | $x_5$        | $x_{17}$     | $x_{18}$     | $x_{19}$     |
|----------|--------------|-------------|--------------|--------------|--------------|--------------|--------------|--------------|
| $x_1$    | 1.00         | <b>0.68</b> | <b>-0.46</b> | <b>0.39</b>  | -0.02        | <b>0.45</b>  | 0.04         | 0.01         |
| $x_2$    | <b>0.68</b>  | 1.00        | -0.10        | <b>0.57</b>  | -0.17        | <b>0.36</b>  | -0.14        | -0.16        |
| $x_3$    | <b>-0.46</b> | -0.10       | 1.00         | 0.07         | -0.15        | 0.23         | -0.06        | -0.03        |
| $x_4$    | <b>0.39</b>  | <b>0.57</b> | 0.07         | 1.00         | -0.14        | <b>0.41</b>  | -0.20        | <b>-0.38</b> |
| $x_5$    | -0.02        | -0.17       | -0.15        | -0.14        | 1.00         | -0.20        | <b>0.70</b>  | <b>0.53</b>  |
| $x_6$    | 0.02         | 0.18        | -0.07        | <b>0.48</b>  | 0.10         | <b>-0.45</b> | -0.27        | <b>-0.48</b> |
| $x_7$    | <b>0.36</b>  | <b>0.51</b> | 0.07         | <b>0.92</b>  | -0.29        | <b>0.65</b>  | -0.17        | -0.32        |
| $x_8$    | <b>0.36</b>  | <b>0.51</b> | 0.07         | <b>0.92</b>  | -0.29        | <b>0.65</b>  | -0.17        | -0.32        |
| $x_9$    | <b>0.48</b>  | 0.08        | -0.17        | 0.24         | 0.09         | 0.18         | 0.10         | -0.05        |
| $x_{10}$ | 0.08         | 0.08        | -0.11        | 0.23         | <b>0.66</b>  | <b>-0.39</b> | 0.27         | 0.12         |
| $x_{11}$ | -0.34        | -0.33       | -0.12        | -0.33        | 0.03         | -0.04        | 0.09         | -0.05        |
| $x_{12}$ | -0.16        | -0.34       | -0.11        | <b>-0.63</b> | 0.27         | <b>-0.57</b> | 0.12         | 0.26         |
| $x_{13}$ | 0.21         | 0.33        | 0.09         | <b>0.57</b>  | <b>-0.76</b> | 0.27         | <b>-0.56</b> | <b>-0.51</b> |
| $x_{14}$ | 0.29         | 0.34        | 0.07         | <b>0.58</b>  | -0.15        | -0.05        | -0.27        | -0.34        |
| $x_{15}$ | 0.34         | <b>0.42</b> | 0.04         | <b>0.67</b>  | -0.01        | <b>0.55</b>  | 0.14         | 0.04         |
| $x_{16}$ | 0.20         | 0.09        | 0.03         | 0.07         | <b>0.41</b>  | -0.12        | 0.25         | 0.33         |
| $x_{17}$ | 0.25         | 0.28        | 0.12         | <b>0.41</b>  | -0.20        | 1.00         | 0.13         | 0.09         |
| $x_{18}$ | 0.04         | -0.14       | -0.06        | -0.20        | <b>0.70</b>  | 0.13         | 1.00         | <b>0.77</b>  |
| $x_{19}$ | 0.01         | -0.16       | -0.03        | <b>-0.38</b> | <b>0.53</b>  | 0.09         | <b>0.77</b>  | 1.00         |

**Note:** Significant Pearson correlation coefficient for each variables in **bold**.

Table S 3: Pearson correlation coefficient between 19 variables in attribute types with Meteorological variables.

|          | $x_6$        | $x_7$        | $x_8$        | $x_9$       | $x_{10}$     | $x_{11}$     | $x_{12}$     | $x_{13}$     | $x_{14}$     | $x_{15}$     | $x_{16}$     |
|----------|--------------|--------------|--------------|-------------|--------------|--------------|--------------|--------------|--------------|--------------|--------------|
| $x_1$    | 0.02         | 0.36         | <b>0.36</b>  | <b>0.48</b> | 0.08         | -0.34        | -0.16        | 0.23         | 0.29         | 0.34         | 0.20         |
| $x_2$    | 0.18         | <b>0.51</b>  | <b>0.51</b>  | 0.08        | 0.08         | -0.33        | -0.34        | 0.33         | 0.34         | <b>0.42</b>  | 0.09         |
| $x_3$    | -0.29        | 0.07         | 0.07         | -0.17       | -0.11        | -0.12        | -0.21        | 0.09         | 0.07         | 0.04         | 0.03         |
| $x_4$    | <b>0.48</b>  | <b>0.92</b>  | <b>0.92</b>  | 0.24        | 0.23         | -0.33        | <b>-0.63</b> | <b>0.57</b>  | <b>0.58</b>  | <b>0.67</b>  | 0.07         |
| $x_5$    | 0.10         | -0.29        | -0.29        | 0.09        | <b>0.66</b>  | 0.03         | 0.27         | <b>-0.76</b> | -0.15        | -0.01        | <b>0.41</b>  |
| $x_6$    | 1.00         | 0.29         | 0.29         | 0.01        | <b>0.66</b>  | 0.09         | -0.27        | 0.14         | <b>0.41</b>  | 0.21         | -0.06        |
| $x_7$    | 0.29         | 1.00         | 1.00         | 0.21        | 0.02         | -0.17        | <b>-0.79</b> | <b>0.65</b>  | <b>0.41</b>  | <b>0.75</b>  | -0.09        |
| $x_8$    | 0.29         | 1.00         | 1.00         | 0.21        | 0.02         | -0.17        | <b>-0.79</b> | <b>0.65</b>  | <b>0.41</b>  | <b>0.75</b>  | -0.09        |
| $x_9$    | 0.01         | 0.21         | 0.21         | 1.00        | 0.15         | -0.30        | -0.08        | 0.03         | 0.29         | 0.27         | 0.29         |
| $x_{10}$ | <b>0.66</b>  | 0.02         | 0.02         | 0.15        | 1.00         | -0.14        | 0.05         | <b>-0.47</b> | <b>0.41</b>  | 0.37         | <b>0.53</b>  |
| $x_{11}$ | 0.09         | -0.17        | -0.17        | -0.30       | -0.14        | 1.00         | -0.21        | -0.21        | <b>-0.70</b> | -0.19        | <b>-0.77</b> |
| $x_{12}$ | -0.27        | <b>-0.79</b> | <b>-0.79</b> | -0.08       | 0.05         | -0.21        | 1.00         | <b>-0.50</b> | 0.06         | <b>-0.60</b> | 0.33         |
| $x_{13}$ | 0.14         | <b>0.65</b>  | <b>0.65</b>  | 0.03        | <b>-0.47</b> | -0.21        | <b>-0.50</b> | 1.00         | 0.29         | 0.18         | -0.29        |
| $x_{14}$ | <b>0.41</b>  | <b>0.41</b>  | <b>0.41</b>  | 0.29        | <b>0.41</b>  | <b>-0.70</b> | 0.06         | 0.29         | 1.00         | <b>0.43</b>  | <b>0.54</b>  |
| $x_{15}$ | 0.21         | <b>0.75</b>  | <b>0.75</b>  | 0.27        | <b>0.37</b>  | -0.19        | <b>-0.60</b> | 0.18         | <b>0.43</b>  | 1.00         | 0.20         |
| $x_{16}$ | -0.06        | -0.09        | -0.09        | 0.29        | <b>0.53</b>  | <b>-0.77</b> | 0.33         | -0.29        | <b>0.54</b>  | 0.20         | 1.00         |
| $x_{17}$ | -0.45        | <b>0.65</b>  | <b>0.65</b>  | 0.18        | <b>-0.39</b> | -0.04        | <b>-0.57</b> | 0.27         | -0.05        | <b>0.55</b>  | -0.12        |
| $x_{18}$ | -0.27        | -0.17        | -0.17        | 0.10        | 0.27         | 0.09         | 0.12         | <b>-0.56</b> | -0.27        | 0.14         | 0.25         |
| $x_{19}$ | <b>-0.48</b> | -0.32        | -0.32        | -0.05       | 0.12         | -0.05        | 0.26         | <b>-0.51</b> | -0.34        | 0.04         | 0.33         |

**Note:** Significant Pearson correlation coefficient for each variables in **bold**.

## 2 Best Model for each stations

Table S 4: Parameter estimation procedures with the number of suitable stations.

| Station | Model  | $\mu$ | $\sigma$ | $\xi$ | NSE  | Station | Model  | $\mu$ | $\sigma$ | $\xi$ | NSE  |
|---------|--------|-------|----------|-------|------|---------|--------|-------|----------|-------|------|
| 353005  | GEVD08 | NS    | S        | NS    | 0.96 | 387401  | GEVD07 | NS    | S        | S     | 0.71 |
| 353011  | GEVD07 | NS    | S        | S     | 0.98 | 388001  | GEVD06 | NS    | NS       | S     | 0.98 |
| 353013  | GEVD07 | NS    | S        | S     | 0.99 | 388002  | GEVD04 | S     | S        | NS    | 0.97 |
| 354003  | GEVD04 | S     | S        | NS    | 0.97 | 388003  | GEVD02 | S     | NS       | S     | 0.97 |
| 354007  | GEVD02 | S     | NS       | S     | 0.99 | 388005  | GEVD01 | S     | S        | S     | 0.99 |
| 354019  | GEVD05 | NS    | NS       | NS    | 0.97 | 388006  | GEVD02 | S     | NS       | S     | 0.87 |
| 354021  | GEVD07 | NS    | S        | S     | 0.98 | 388007  | GEVD03 | S     | NS       | NS    | 0.94 |
| 354022  | GEVD02 | S     | NS       | S     | 0.93 | 388008  | GEVD07 | NS    | S        | S     | 0.96 |
| 354024  | GEVD08 | NS    | S        | NS    | 0.91 | 388009  | GEVD07 | NS    | S        | S     | 0.98 |
| 354025  | GEVD08 | NS    | S        | NS    | 0.95 | 388011  | GEVD02 | S     | NS       | S     | 0.99 |
| 360001  | GEVD02 | S     | NS       | S     | 0.94 | 388012  | GEVD03 | S     | NS       | NS    | 0.98 |
| 360002  | GEVD08 | NS    | S        | NS    | 0.97 | 388013  | GEVD01 | S     | S        | S     | 0.97 |
| 360003  | GEVD01 | S     | S        | S     | 0.99 | 388014  | GEVD08 | NS    | S        | NS    | 0.99 |
| 360005  | GEVD05 | NS    | NS       | NS    | 0.94 | 388401  | GEVD08 | NS    | S        | NS    | 0.98 |
| 360006  | GEVD01 | S     | S        | S     | 0.98 | 403001  | GEVD06 | NS    | NS       | S     | 0.96 |
| 360007  | GEVD06 | NS    | NS       | S     | 0.86 | 403002  | GEVD02 | S     | NS       | S     | 0.98 |
| 379043  | GEVD02 | S     | NS       | S     | 0.92 | 403003  | GEVD01 | S     | S        | S     | 0.99 |
| 381001  | GEVD06 | NS    | NS       | S     | 0.77 | 403004  | GEVD08 | NS    | S        | NS    | 0.89 |
| 381003  | GEVD03 | S     | NS       | NS    | 0.94 | 403005  | GEVD02 | S     | NS       | S     | 0.60 |
| 381004  | GEVD03 | S     | NS       | NS    | 0.98 | 403006  | GEVD07 | NS    | S        | S     | 0.95 |
| 381005  | GEVD07 | NS    | S        | S     | 0.92 | 403007  | GEVD05 | NS    | NS       | NS    | 0.86 |
| 381006  | GEVD03 | S     | NS       | NS    | 0.75 | 403009  | GEVD03 | S     | NS       | NS    | 0.98 |
| 381007  | GEVD08 | NS    | S        | NS    | 0.99 | 403010  | GEVD08 | NS    | S        | NS    | 0.99 |
| 381008  | GEVD03 | S     | NS       | NS    | 0.99 | 403011  | GEVD07 | NS    | S        | S     | 0.99 |
| 381010  | GEVD07 | NS    | S        | S     | 0.97 | 403012  | GEVD06 | NS    | NS       | S     | 0.99 |
| 381011  | GEVD06 | NS    | NS       | S     | 0.98 | 403016  | GEVD01 | S     | S        | S     | 0.97 |
| 381012  | GEVD05 | NS    | NS       | NS    | 0.61 | 403017  | GEVD08 | NS    | S        | NS    | 0.98 |
| 381014  | GEVD02 | S     | NS       | S     | 0.97 | 403019  | GEVD01 | S     | S        | S     | 0.98 |
| 381015  | GEVD04 | S     | S        | NS    | 0.98 | 403201  | GEVD08 | NS    | S        | NS    | 0.96 |
| 381016  | GEVD08 | NS    | S        | NS    | 0.99 | 405001  | GEVD01 | S     | S        | S     | 0.99 |
| 381017  | GEVD08 | NS    | S        | NS    | 0.99 | 405003  | GEVD03 | S     | NS       | NS    | 0.98 |
| 381022  | GEVD06 | NS    | NS       | S     | 0.97 | 405005  | GEVD05 | NS    | NS       | NS    | 0.94 |
| 381023  | GEVD07 | NS    | S        | S     | 0.98 | 405006  | GEVD08 | NS    | S        | NS    | 0.60 |
| 381024  | GEVD07 | NS    | S        | S     | 0.97 | 405007  | GEVD05 | NS    | NS       | NS    | 0.95 |
| 381025  | GEVD02 | S     | NS       | S     | 0.96 | 405008  | GEVD03 | S     | NS       | NS    | 0.98 |
| 381026  | GEVD05 | NS    | NS       | NS    | 0.62 | 405011  | GEVD03 | S     | NS       | NS    | 0.95 |
| 381027  | GEVD04 | S     | S        | NS    | 0.99 | 405017  | GEVD08 | NS    | S        | NS    | 0.99 |
| 381028  | GEVD02 | S     | NS       | S     | 0.98 | 405201  | GEVD07 | NS    | S        | S     | 0.96 |
| 381201  | GEVD08 | NS    | S        | NS    | 0.87 | 405301  | GEVD04 | S     | S        | NS    | 0.97 |
| 381202  | GEVD07 | NS    | S        | S     | 0.85 | 406001  | GEVD06 | NS    | NS       | S     | 0.97 |
| 381301  | GEVD04 | S     | S        | NS    | 0.79 | 406002  | GEVD01 | S     | S        | S     | 0.99 |
| 387001  | GEVD02 | S     | NS       | S     | 0.97 | 406003  | GEVD03 | S     | NS       | NS    | 0.99 |
| 387006  | GEVD07 | NS    | S        | S     | 0.98 | 406007  | GEVD01 | S     | S        | S     | 0.98 |
| 387011  | GEVD02 | S     | NS       | S     | 0.99 | 406008  | GEVD04 | S     | S        | NS    | 0.99 |
| 387013  | GEVD06 | NS    | NS       | S     | 0.98 | 407008  | GEVD02 | S     | NS       | S     | 0.96 |
| 387014  | GEVD06 | NS    | NS       | S     | 0.95 | 431027  | GEVD06 | NS    | NS       | S     | 0.98 |

**Note:** S is stationary process and NS is a non-stationary process from the ANN model.

## 2.1 Structure of ANN01 for parameter $\mu$

The model can be seen more clearly in Eq.1 and Table 5 , where we present the structure of ANN01 model.

$$\mu = \left[ \sum_{j=1}^1 \left( \sum_{i=2}^{19} (w_{ij} y_i) + b_j \right) v_j \right] \varphi, \quad (1)$$

Table S 5: ANN model structure of ANN01 (18-1-1)

| Input variables  | $w_{ij}$ | $b_j$ | $v_j$ | $\varphi$ |
|------------------|----------|-------|-------|-----------|
| sigma            | 1.60     |       |       |           |
| xi               | 2.53     |       |       |           |
| LAT              | 2.46     |       |       |           |
| LON              | 1.91     |       |       |           |
| max_rain         | 3.15     |       |       |           |
| average_rain     | -0.46    |       |       |           |
| sum_rain         | 1.67     |       |       |           |
| min_average_rain | 2.26     |       |       |           |
| max_wind         | 2.78     | 2.39  | -1.04 | 1.50      |
| average_wind     | 2.52     |       |       |           |
| max_temp         | 1.64     |       |       |           |
| min_temp         | 1.80     |       |       |           |
| average_temp     | 1.12     |       |       |           |
| average_RH       | 1.07     |       |       |           |
| max_RH           | 2.44     |       |       |           |
| NDVI             | 2.59     |       |       |           |
| runoff_max       | 2.19     |       |       |           |
| average_runoff   | 2.55     |       |       |           |

## 2.2 Structure of ANN10 for parameter $\sigma$

The model can be seen more clearly in Eq.2 and Table 6, where we present the structure of ANN10 model.

$$\sigma = \left[ ((w_{1,1}x_1 + w_{3,1}x_3 + w_{4,1}x_4 + w_{5,1}x_5 + w_{6,1}x_6 + w_{7,1}x_7 + w_{8,1}x_8 + w_{9,1}x_9 + w_{10,1}x_{10}) + b_1)v_1 \right] \varphi, \quad (2)$$

Table S 6: ANN model structure of ANN10 (9-1-1)

| Input variables | $w_{ij}$ | $b_j$ | $v_j$ | $\varphi$ |
|-----------------|----------|-------|-------|-----------|
| mu              | 2.93     |       |       |           |
| xi              | -0.68    |       |       |           |
| LON             | 1.51     |       |       |           |
| LAT             | -1.15    |       |       |           |
| max_rain        | 0.31     | 0.003 | 0.10  | 0.69      |
| average_rain    | 0.32     |       |       |           |
| sum_rain        | 0.34     |       |       |           |
| max_wind        | -0.08    |       |       |           |
| average_wind    | -1.20    |       |       |           |

## 2.3 Structure of ANN19 for parameter $\xi$

The model can be seen more clearly in Eq.3 and Table 7, where we present the structure of ANN19 model.

$$\xi = \left[ \sum_{j=1}^6 ((w_{1j}x_1 + w_{2j}x_2 + w_{4j}x_4 + w_{5j}x_5 + w_{6j}x_6 + w_{7j}x_7 + w_{8j}x_8 + w_{9j}x_9 + w_{10j}x_{10})) + b_j)v_j \right] \varphi, \quad (3)$$

Table S 7: ANN model structure of ANN19 (9-6-1)

| Input variables | $w_{i1}$ | $w_{i2}$ | $w_{i3}$ | $w_{i4}$ | $w_{i5}$ | $w_{i6}$ | $b_j$  | $v_j$  | $\varphi$ |
|-----------------|----------|----------|----------|----------|----------|----------|--------|--------|-----------|
| mu              | -2.47    | 0.46     | -6.78    | 12.00    | -10.61   | 1.43     |        |        |           |
| sigma           | -1.97    | -0.24    | -2.06    | -0.83    | 15.25    | -1.45    |        |        |           |
| LON             | 1.15     | -1.96    | -0.70    | -2.92    | -2.60    | -1.32    | 0.83,  | 0.76,  |           |
| LAT             | -0.42    | -1.94    | 1.72     | -5.43    | -6.94    | -1.94    | 0.20,  | -1.69, |           |
| max_rain        | 4.94     | 1.39     | 2.54     | -7.25    | 35.27    | -1.09    | -0.13, | 0.84,  | -0.43     |
| average_rain    | -1.98    | -0.05    | 1.36     | 2.56     | -3.71    | -4.82    | 2.48,  | 0.67,  |           |
| sum_rain        | 0.15     | -0.44    | 0.43     | 1.90     | -4.37    | -5.70    | 2.61,  | 0.68,  |           |
| max_wind        | -0.81    | 1.05     | -0.20    | -0.27    | -7.70    | 4.52     | -0.50  | 1.001  |           |
| average_wind    | 3.38     | 1.90     | 0.16     | 0.98     | -1.37    | 1.03     |        |        |           |

### 3 Parameter Estimation

Table S 8: Parameter estimates and standard error (SE) for the maximum monthly rainfall(mm.)

| Station | $\hat{\mu}$ (SE) | $\hat{\sigma}$ (SE) | $\hat{\xi}$ (SE) | ID     | $\hat{\mu}$ (SE) | $\hat{\sigma}$ (SE) | $\hat{\xi}$ (SE) |
|---------|------------------|---------------------|------------------|--------|------------------|---------------------|------------------|
| 353005  | 22.76(1.89)      | 17.87(1.43)         | 0.20(0.07)       | 387013 | 20.73(1.89)      | 17.42(1.51)         | 0.16(0.10)       |
| 353011  | 30.29(2.57)      | 24.48(2.06)         | 0.19(0.08)       | 387014 | 28.59(2.04)      | 22.43(1.64)         | 0.14(0.09)       |
| 353013  | 29.06(2.17)      | 21.17(1.57)         | 0.01(0.07)       | 387401 | 23.48(2.72)      | 21.17(2.14)         | 0.24(0.07)       |
| 354003  | 30.24(2.35)      | 22.33(1.75)         | -0.06(0.08)      | 388001 | 23.93(2.38)      | 19.64(1.81)         | 0.12(0.09)       |
| 354007  | 26.37(2.36)      | 20.18(1.79)         | 0.06(0.10)       | 388002 | 31.07(2.79)      | 24.33(2.10)         | 0.15(0.08)       |
| 354019  | 32.07(2.62)      | 23.69(1.9)          | -0.26(0.10)      | 388003 | 25.78(2.36)      | 20.53(1.84)         | 0.14(0.08)       |
| 354021  | 29.83(2.66)      | 21.79(1.99)         | -0.02(0.10)      | 388005 | 33.46(2.79)      | 23.2(2.16)          | 0.08(0.10)       |
| 354022  | 20.17(1.95)      | 17.36(1.6)          | 0.10(0.11)       | 388006 | 27.51(2.25)      | 21.36(1.86)         | 0.18(0.10)       |
| 354024  | 28.94(2.2)       | 21.38(1.62)         | -0.04(0.07)      | 388007 | 26.86(2.04)      | 20.7(1.61)          | 0.03(0.09)       |
| 354025  | 27.03(2.4)       | 21.52(1.78)         | 0.04(0.08)       | 388008 | 26.75(2.79)      | 20.49(2.21)         | 0.16(0.11)       |
| 360001  | 27.89(2.17)      | 20.1(1.69)          | 0.11(0.08)       | 388009 | 29.49(2.59)      | 23.27(2.15)         | 0.19(0.1)        |
| 360002  | 31.63(2.12)      | 21.2(1.56)          | -0.05(0.08)      | 388011 | 28.67(2.53)      | 21.78(1.94)         | 0.02(0.11)       |
| 360003  | 26.6(2.24)       | 19.28(1.63)         | -0.03(0.08)      | 388012 | 31.71(2.44)      | 22.74(1.78)         | -0.04(0.09)      |
| 360005  | 27.05(2.14)      | 20.81(1.57)         | -0.03(0.07)      | 388013 | 24.66(1.91)      | 19.75(1.45)         | 0.17(0.07)       |
| 360006  | 24.39(2.35)      | 19.7(1.78)          | 0.08(0.09)       | 388014 | 26.88(2.24)      | 20.68(1.72)         | 0.13(0.08)       |
| 360007  | 26.36(1.93)      | 18.88(1.55)         | 0.09(0.08)       | 388401 | 27.2(2.77)       | 22.65(2.19)         | 0.13(0.11)       |
| 379043  | 19.75(2.01)      | 16.68(1.53)         | 0.17(0.10)       | 403001 | 22.94(1.96)      | 18.53(1.46)         | 0.11(0.07)       |
| 381001  | 26.79(2.09)      | 22.11(1.65)         | 0.19(0.07)       | 403002 | 23.31(2.02)      | 18.49(1.59)         | 0.13(0.09)       |
| 381003  | 27.07(2.09)      | 20.00(1.58)         | 0.07(0.09)       | 403003 | 21.76(1.73)      | 14.19(1.31)         | 0.04(0.10)       |
| 381004  | 26.55(2.21)      | 20.77(1.68)         | -0.02(0.09)      | 403004 | 26.49(2.35)      | 20.14(1.86)         | -0.02(0.09)      |
| 381005  | 27.21(2.08)      | 20.70(1.49)         | 0.08(0.06)       | 403005 | 24.3(2.02)       | 19.39(1.64)         | 0.21(0.08)       |
| 381006  | 25.48(2.18)      | 21.29(1.68)         | 0.21(0.07)       | 403006 | 24.37(1.77)      | 17.4(1.27)          | 0.01(0.07)       |
| 381007  | 26.8(2.26)       | 18.84(1.70)         | 0.05(0.09)       | 403007 | 23.66(2)         | 17.82(1.59)         | 0.08(0.08)       |
| 381008  | 25.08(2.09)      | 19.44(1.59)         | 0.01(0.10)       | 403009 | 31.79(2.25)      | 21.97(1.62)         | -0.21(0.07)      |
| 381010  | 28.83(2.17)      | 20.38(1.58)         | -0.15(0.08)      | 403010 | 26.38(2.28)      | 20.06(1.73)         | 0.15(0.08)       |
| 381011  | 26.75(2.27)      | 19.65(1.7)          | 0.08(0.08)       | 403011 | 21.37(2.12)      | 17.64(1.73)         | 0.23(0.10)       |
| 381012  | 28.9(2.28)       | 21.35(1.9)          | 0.02(0.09)       | 403012 | 24.89(2.1)       | 18.48(1.61)         | 0.01(0.10)       |
| 381014  | 25.59(2.24)      | 20.67(1.82)         | 0.12(0.1)        | 403016 | 25.84(1.91)      | 17.92(1.36)         | -0.02(0.07)      |
| 381015  | 23.93(2.33)      | 18.92(1.77)         | 0.06(0.1)        | 403017 | 23.7(2.32)       | 19.4(1.83)          | 0.13(0.10)       |
| 381016  | 24.48(2.38)      | 20.07(1.8)          | 0.03(0.1)        | 403019 | 29.74(1.98)      | 20.85(1.57)         | 0.04(0.09)       |
| 381017  | 23.79(2.13)      | 18.72(1.59)         | 0.02(0.09)       | 403201 | 23.17(2.32)      | 20.17(1.71)         | 0.12(0.07)       |
| 381022  | 26.43(2.46)      | 20.68(1.83)         | 0.04(0.08)       | 405001 | 30.21(2.58)      | 23.17(1.97)         | 0.05(0.10)       |
| 381023  | 26.34(2.31)      | 21.23(1.71)         | 0.08(0.08)       | 405003 | 31.73(2.55)      | 22.64(1.87)         | 0.03(0.08)       |
| 381024  | 26.54(2.22)      | 20.88(1.67)         | 0.16(0.08)       | 405005 | 29.37(3.09)      | 23.06(2.64)         | 0.18(0.15)       |
| 381025  | 25.65(2.02)      | 19.43(1.5)          | 0.09(0.07)       | 405006 | 33.3(2.81)       | 25.04(2.12)         | -0.07(0.06)      |
| 381026  | 27.06(2.29)      | 21.36(1.85)         | 0.21(0.07)       | 405007 | 31.8(2.63)       | 23.45(1.93)         | -0.06(0.08)      |
| 381027  | 26.84(2.17)      | 21.04(1.71)         | 0.14(0.09)       | 405008 | 31.35(2.93)      | 23.5(2.22)          | -0.04(0.10)      |
| 381028  | 27.61(2.13)      | 20.91(1.66)         | 0.05(0.09)       | 405011 | 29.39(2.68)      | 22.09(2.09)         | 0.03(0.10)       |
| 381201  | 23.64(2.38)      | 20.05(1.76)         | 0.06(0.07)       | 405017 | 30.66(2.88)      | 22.75(2.16)         | 0.1(0.09)        |
| 381202  | 25.13(2.54)      | 21.2(1.88)          | 0.03(0.07)       | 405201 | 25.51(2.93)      | 22.78(2.45)         | 0.25(0.13)       |
| 381301  | 34.69(3.15)      | 26.59(2.53)         | 0.22(0.09)       | 405301 | 25.7(2.62)       | 23.92(2.02)         | 0.18(0.08)       |
| 387001  | 31.75(2.82)      | 22.63(2.08)         | 0.02(0.08)       | 406001 | 24.97(2.48)      | 21.45(1.92)         | 0.19(0.09)       |
| 387006  | 30.02(2.69)      | 21.84(2.09)         | 0.001(0.12)      | 406002 | 29.95(2.88)      | 25.48(2.25)         | 0.10(0.10)       |
| 387011  | 30.84(2.82)      | 22.3(2.12)          | 0.09(0.09)       | 406003 | 26.56(2.85)      | 23.16(2.25)         | 0.17(0.11)       |



## 4 Return Level Estimation

Table S 9: Estimated return level for 2, 5, 10, 20, 50 and 100 years return period for the maximum monthly rainfall(mm.).

| Station | 2-year | 5-year | 10-year | 20-year | 50-year | 100-year |
|---------|--------|--------|---------|---------|---------|----------|
| 353005  | 29.55  | 54.03  | 73.57   | 95.29   | 128.49  | 157.76   |
| 353011  | 39.59  | 72.83  | 99.16   | 128.24  | 172.35  | 210.97   |
| 353013  | 36.82  | 60.74  | 76.54   | 91.66   | 111.18  | 125.77   |
| 354003  | 38.33  | 62.20  | 77.08   | 90.71   | 107.45  | 119.37   |
| 354007  | 33.85  | 57.96  | 74.79   | 91.62   | 114.44  | 132.34   |
| 354019  | 40.36  | 61.51  | 72.45   | 81.13   | 90.20   | 95.69    |
| 354021  | 37.79  | 62.05  | 77.82   | 92.73   | 111.73  | 125.75   |
| 354022  | 26.65  | 48.26  | 63.97   | 80.18   | 102.97  | 121.48   |
| 354024  | 36.71  | 60.04  | 74.90   | 88.74   | 106.05  | 118.61   |
| 354025  | 34.98  | 60.25  | 77.59   | 94.69   | 117.53  | 135.19   |
| 360001  | 35.41  | 60.77  | 79.47   | 98.98   | 126.75  | 149.59   |
| 360002  | 39.33  | 62.16  | 76.52   | 89.74   | 106.11  | 117.84   |
| 360003  | 33.63  | 54.92  | 68.65   | 81.55   | 97.86   | 109.81   |
| 360005  | 34.63  | 57.53  | 72.23   | 86.02   | 103.39  | 116.07   |
| 360006  | 31.71  | 55.72  | 72.81   | 90.17   | 114.12  | 133.23   |
| 360007  | 33.40  | 56.66  | 73.42   | 90.58   | 114.50  | 133.77   |
| 379043  | 26.06  | 48.23  | 65.42   | 84.10   | 111.91  | 135.82   |
| 381001  | 35.17  | 65.02  | 88.52   | 114.35  | 153.34  | 187.30   |
| 381003  | 34.49  | 58.59  | 75.55   | 92.62   | 115.94  | 134.37   |
| 381004  | 34.15  | 57.35  | 72.50   | 86.85   | 105.20  | 118.78   |
| 381005  | 34.91  | 60.23  | 78.33   | 96.75   | 122.26  | 142.68   |
| 381006  | 33.60  | 63.03  | 86.75   | 113.31  | 154.24  | 190.62   |
| 381007  | 33.77  | 56.11  | 71.59   | 86.97   | 107.68  | 123.83   |
| 381008  | 32.22  | 54.46  | 69.33   | 83.70   | 102.46  | 116.63   |
| 381010  | 36.10  | 56.29  | 67.94   | 77.98   | 89.50   | 97.17    |
| 381011  | 34.05  | 57.95  | 74.93   | 92.15   | 115.86  | 134.76   |
| 381012  | 36.74  | 61.31  | 77.83   | 93.87   | 114.92  | 130.90   |
| 381014  | 33.34  | 59.67  | 79.26   | 99.84   | 129.37  | 153.84   |
| 381015  | 30.94  | 53.55  | 69.33   | 85.11   | 106.51  | 123.30   |
| 381016  | 31.88  | 55.23  | 71.10   | 86.65   | 107.23  | 123.02   |
| 381017  | 30.68  | 52.40  | 67.11   | 81.48   | 100.47  | 114.99   |
| 381022  | 34.07  | 58.49  | 75.35   | 92.04   | 114.45  | 131.86   |
| 381023  | 34.24  | 60.27  | 78.93   | 97.96   | 124.36  | 145.55   |
| 381024  | 34.43  | 62.05  | 83.39   | 106.48  | 140.73  | 170.06   |
| 381025  | 32.88  | 56.74  | 73.84   | 91.31   | 115.57  | 135.06   |
| 381026  | 35.20  | 64.65  | 88.33   | 114.79  | 155.46  | 191.53   |
| 381027  | 34.75  | 61.86  | 82.25   | 103.87  | 135.19  | 161.41   |
| 381028  | 35.35  | 60.27  | 77.62   | 94.93   | 118.34  | 136.67   |
| 381201  | 31.07  | 55.05  | 71.80   | 88.56   | 111.30  | 129.15   |
| 381202  | 32.94  | 57.61  | 74.38   | 90.80   | 112.54  | 129.22   |
| 381301  | 44.84  | 81.96  | 112.17  | 146.25  | 199.22  | 246.69   |
| 387001  | 40.08  | 66.20  | 83.82   | 100.96  | 123.51  | 140.68   |
| 387006  | 38.03  | 62.80  | 79.21   | 94.96   | 115.35  | 130.64   |
| 387011  | 39.14  | 66.54  | 86.20   | 106.28  | 134.20  | 156.63   |
| 387013  | 27.31  | 50.26  | 67.90   | 86.94   | 115.06  | 139.05   |
| 387014  | 37.02  | 65.92  | 87.65   | 110.69  | 144.06  | 172.00   |

Table S 10: Estimated return level for 2, 5, 10, 20, 50 and 100 years return period for the maximum monthly rainfall(mm.).

| Station | 2-year | 5-year | 10-year | 20-year | 50-year | 100-year |
|---------|--------|--------|---------|---------|---------|----------|
| 387401  | 31.59  | 61.63  | 86.47   | 114.83  | 159.53  | 200.15   |
| 388001  | 31.29  | 56.19  | 74.63   | 93.94   | 121.52  | 144.30   |
| 388002  | 40.24  | 71.96  | 96.11   | 121.96  | 159.80  | 191.81   |
| 388003  | 33.51  | 60.15  | 80.35   | 101.88  | 133.27  | 159.72   |
| 388005  | 42.10  | 70.56  | 90.96   | 111.79  | 140.69  | 163.89   |
| 388006  | 35.60  | 64.28  | 86.76   | 111.36  | 148.33  | 180.39   |
| 388007  | 34.48  | 58.56  | 74.92   | 90.94   | 112.16  | 128.42   |
| 388008  | 34.49  | 61.55  | 82.40   | 104.95  | 138.32  | 166.86   |
| 388009  | 38.33  | 70.00  | 95.14   | 122.95  | 165.21  | 202.27   |
| 388011  | 36.68  | 61.88  | 78.92   | 95.53   | 117.43  | 134.14   |
| 388012  | 39.98  | 64.81  | 80.63   | 95.36   | 113.80  | 127.17   |
| 388013  | 32.13  | 58.45  | 78.91   | 101.18  | 134.40  | 163.03   |
| 388014  | 34.63  | 61.00  | 80.64   | 101.29  | 130.95  | 155.56   |
| 388401  | 35.71  | 64.82  | 86.67   | 109.80  | 143.24  | 171.17   |
| 403001  | 29.88  | 53.21  | 70.36   | 88.23   | 113.60  | 134.41   |
| 403002  | 30.25  | 53.90  | 71.57   | 90.19   | 117.00  | 139.31   |
| 403003  | 27.00  | 43.78  | 55.36   | 66.85   | 82.27   | 94.26    |
| 403004  | 33.84  | 56.20  | 70.71   | 84.40   | 101.80  | 114.60   |
| 403005  | 31.68  | 58.37  | 79.79   | 103.68  | 140.35  | 172.82   |
| 403006  | 30.75  | 50.56  | 63.74   | 76.43   | 92.92   | 105.33   |
| 403007  | 30.28  | 52.00  | 67.47   | 83.19   | 104.88  | 122.20   |
| 403009  | 39.54  | 60.13  | 71.35   | 80.60   | 90.70   | 97.10    |
| 403010  | 33.94  | 60.05  | 79.90   | 101.11  | 132.13  | 158.33   |
| 403011  | 28.12  | 52.99  | 73.42   | 96.64   | 133.03  | 165.92   |
| 403012  | 31.67  | 52.76  | 66.82   | 80.37   | 98.02   | 111.33   |
| 403016  | 32.39  | 52.38  | 65.41   | 77.76   | 93.52   | 105.17   |
| 403017  | 30.98  | 55.84  | 74.43   | 94.07   | 122.37  | 145.95   |
| 403019  | 37.44  | 62.08  | 79.10   | 95.98   | 118.65  | 136.27   |
| 403201  | 30.72  | 56.20  | 75.01   | 94.64   | 122.62  | 145.65   |
| 405001  | 38.78  | 66.40  | 85.62   | 104.80  | 130.74  | 151.05   |
| 405003  | 40.07  | 66.43  | 84.36   | 101.93  | 125.23  | 143.10   |
| 405005  | 38.10  | 68.98  | 93.11   | 119.47  | 158.98  | 193.16   |
| 405006  | 42.36  | 68.95  | 85.43   | 100.45  | 118.80  | 131.79   |
| 405007  | 40.31  | 65.53  | 81.37   | 95.94   | 113.95  | 126.84   |
| 405008  | 39.91  | 65.64  | 82.08   | 97.43   | 116.70  | 130.70   |
| 405011  | 37.53  | 63.34  | 80.95   | 98.25   | 121.24  | 138.93   |
| 405017  | 39.14  | 67.41  | 87.92   | 109.07  | 138.74  | 162.82   |
| 405201  | 34.25  | 66.88  | 94.11   | 125.44  | 175.24  | 220.85   |
| 405301  | 34.75  | 66.74  | 91.70   | 118.94  | 159.71  | 194.93   |
| 406001  | 33.11  | 62.30  | 85.47   | 111.09  | 150.04  | 184.19   |
| 406002  | 39.46  | 71.16  | 94.21   | 118.00  | 151.44  | 178.61   |
| 406003  | 35.32  | 66.03  | 89.80   | 115.57  | 153.86  | 186.72   |
| 406007  | 48.80  | 80.43  | 101.83  | 122.71  | 150.26  | 171.29   |
| 406008  | 31.68  | 60.07  | 84.32   | 112.75  | 158.92  | 202.08   |
| 407008  | 42.47  | 72.08  | 93.40   | 115.25  | 145.70  | 170.25   |
| 431027  | 32.90  | 57.91  | 75.66   | 93.64   | 118.36  | 138.03   |
